# Supplementary material for: Bioinformatics analysis of the clinical value and potential mechanisms of AHNAK2 in papillary thyroid carcinoma
Source: Aging (Albany NY). 2020 Sep 23;12(18):18163–80. doi: 10.18632/aging.103645 (PMC7585101; doi:10.18632/aging.103645)
Supplement: Supplementary Figure 1 [file aging-12-103645-s001..pdf]

## SUPPLEMENTARY FIGURE

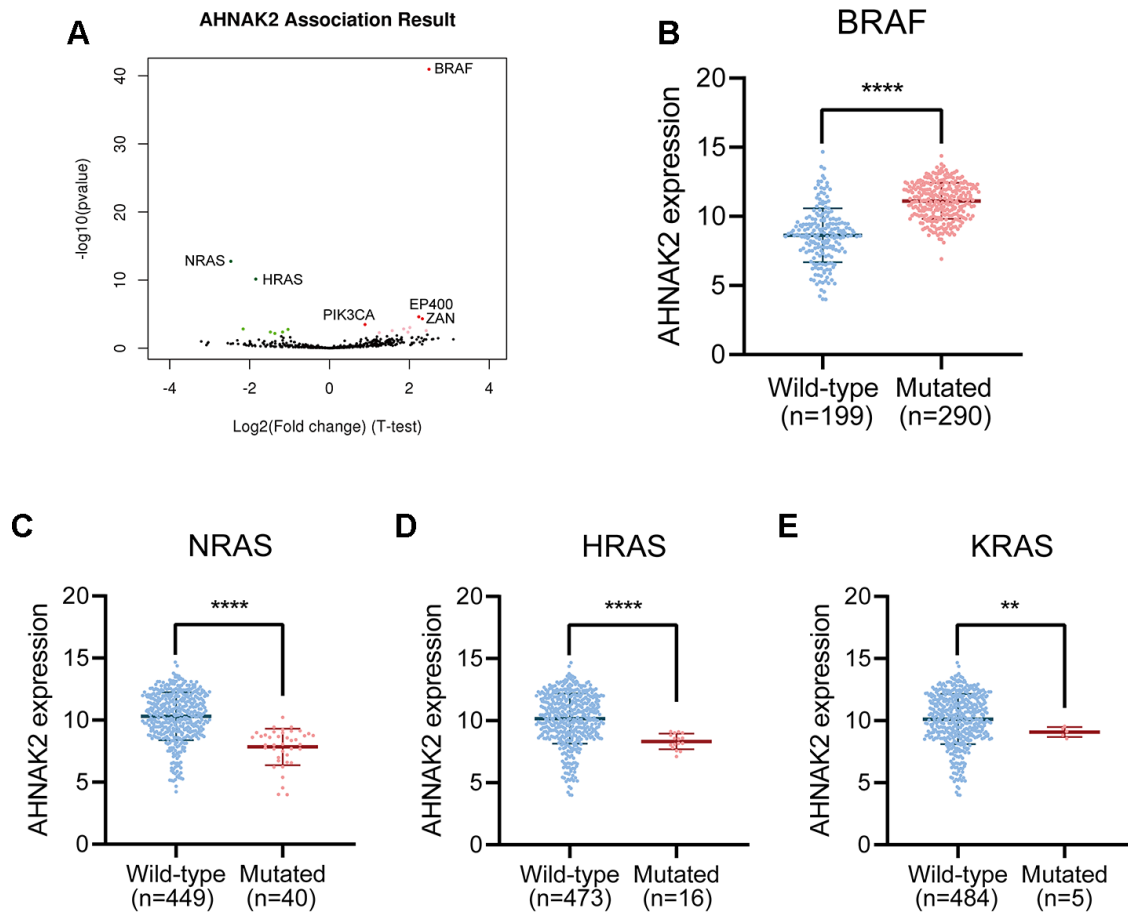

**Supplementary Figure 1. Relationship between AHNAK2 expression and gene mutation in PTC (LinkedOmics).** (A) Volcano map of the relationship between AHNAK2 expression and gene mutation in THCA. (B) Effect of BRAF mutation, (C) NRAS mutation, (D) HRAS mutation and (E) KRAS mutation on AHNAK2 expression level.
